# Supplementary material
Source: Copernicus journal article supplement (doi:10.5194/egusphere-2026-2505)
Supplement: Supplementary file 1 [file egusphere-2026-2505-supplement.pdf]

# Dynamic Satellite-Derived Vegetation and Radiation Inputs Advance Continental-Scale Hydrological Simulation Across China

Tab. S1. Attributes of the 50 hydrological stations and their controlled basins within the nine major river basins. In the 'River basin' field, the abbreviations are: Yz. RB for Yangtze River Basin, Ye. RB for Yellow River Basin, Huai. RB for Huai River Basin, Hai. RB for Hai River Basin, Pe. RB for Pearl River Basin, SL RB for Songliao River Basin, SE RB for Southeast Rivers Basin, In. RB for Interior Rivers Basin, and SW RB for Southwest Rivers Basin. The 'Area' field represents the drainage area controlled by the hydrological station. For the 'Source' field, CRSB indicates data from the *China River Sediment Bulletin*, AHR indicates data from the *Annual Hydrological Report for P.R.C.*, and Center indicates data from the National Earth System Science Data Center – Loess Plateau Sub-center. In the 'Application' field, Validation denotes use for VIC model parameter calibration and validation, while Transfer denotes use for validating the parameter transfer process.

| FID | River basin | Hydrological station | Lon. (°) | Lat. (°) | Area (10 <sup>4</sup> km <sup>2</sup> ) | Data period (Monthly) | Source | Application |
|-----|-------------|----------------------|----------|----------|-----------------------------------------|-----------------------|--------|-------------|
| 1   | Yz. RB      | Zhimenda             | 97.25    | 32.99    | 13.77                                   | 2000–2011, 2013–2020  | CRSB   | Validation  |
| 2   |             | Gaochang             | 104.42   | 28.80    | 13.54                                   | 2003–2020             | CRSB   | Transfer    |
| 3   |             | Beibei               | 106.42   | 29.85    | 15.67                                   | 2001–2020             | CRSB   | Validation  |
| 4   |             | Wulong               | 107.73   | 29.33    | 8.30                                    | 2001–2020             | CRSB   | Validation  |
| 5   |             | Huangzhuang          | 112.56   | 31.19    | 14.21                                   | 2001–2020             | CRSB   | Validation  |
| 6   |             | Tongzilin            | 101.84   | 26.69    | 12.84                                   | 2013–2020             | CRSB   | Validation  |
| 7   |             | Xiangtan             | 112.93   | 27.87    | 8.16                                    | 2002–2020             | CRSB   | Validation  |
| 8   |             | Taoyuan              | 111.48   | 28.90    | 8.52                                    | 2003–2020             | CRSB   | Transfer    |
| 9   |             | Waizhou              | 115.84   | 28.63    | 8.09                                    | 2002–2020             | CRSB   | Validation  |
| 10  |             | Lijiadu              | 116.16   | 28.22    | 1.58                                    | 2000–2013             | AHR    | Validation  |
| 11  |             | Meigang              | 116.82   | 28.44    | 1.55                                    | 2003–2020             | CRSB   | Transfer    |
| 12  |             | Hushan               | 117.27   | 28.92    | 0.64                                    | 2000–2013             | CRSB   | Validation  |
| 13  |             | Wanjiabu             | 115.65   | 28.85    | 0.35                                    | 2000–2008             | AHR    | Validation  |
| 14  |             | Dufengkeng           | 117.20   | 29.27    | 0.50                                    | 2000–2013             | AHR    | Validation  |
| 15  | Ye. RB      | Tangnaihai           | 100.15   | 35.50    | 12.20                                   | 2001–2020             | CRSB   | Validation  |
| 16  |             | Zhangjiashan         | 108.59   | 34.64    | 4.32                                    | 2007–2019             | Center | Validation  |
| 17  |             | Zhuangtou            | 109.84   | 35.00    | 2.56                                    | 2007–2019             | Center | Validation  |
| 18  |             | Huaxian              | 109.76   | 34.58    | 10.65                                   | 2009–2019             | Center | Validation  |
| 19  |             | Heishiguan           | 112.93   | 34.72    | 1.86                                    | 2009–2019             | Center | Transfer    |
| 20  |             | Wuzhi                | 113.27   | 35.07    | 1.29                                    | 2013–2018             | Center | Validation  |
| 21  |             | Baimasi              | 112.58   | 34.71    | 1.19                                    | 2007–2019             | Center | Validation  |
| 22  |             | Xianyang             | 108.70   | 34.32    | 4.68                                    | 2009–2019             | Center | Validation  |
| 23  | Huai. RB    | Linyi                | 118.40   | 35.02    | 1.03                                    | 2002–2020             | CRSB   | Validation  |
| 24  |             | Bengbu               | 117.37   | 32.95    | 12.13                                   | 2002–2020             | CRSB   | Validation  |
| 25  |             | Xixian               | 114.73   | 32.33    | 1.02                                    | 2002–2020             | CRSB   | Transfer    |
| 26  |             | Fuyang               | 115.83   | 32.90    | 3.52                                    | 2002–2020             | CRSB   | Validation  |

|    |         |             |        |       |       |                         |      |            |
|----|---------|-------------|--------|-------|-------|-------------------------|------|------------|
| 27 | Hai. RB | Xiahui      | 117.17 | 40.62 | 0.53  | 2003–2020               | CRSB | Validation |
| 28 |         | Zhangjiafen | 116.77 | 40.62 | 0.85  | 2003–2020               | CRSB | Validation |
| 29 |         | Guantai     | 114.08 | 36.33 | 1.78  | 2016–2020               | CRSB | Validation |
| 30 |         | Yuancunji   | 115.06 | 36.11 | 1.43  | 2016–2020               | CRSB | Validation |
| 31 | Pe. RB  | Qianjiang   | 108.97 | 23.62 | 12.89 | 2003–2020               | CRSB | Validation |
| 32 |         | Liuzhou     | 109.40 | 24.33 | 4.54  | 2003–2020               | CRSB | Transfer   |
| 33 |         | Nanning     | 108.24 | 22.83 | 7.27  | 2003–2020               | CRSB | Validation |
| 34 |         | Shijiao     | 112.95 | 23.57 | 3.84  | 2002–2020               | CRSB | Validation |
| 35 |         | Boluo       | 114.30 | 23.17 | 2.53  | 2002–2020               | CRSB | Validation |
| 36 |         | Xiaolongtan | 103.19 | 23.81 | 1.54  | 2003–2020               | CRSB | Validation |
| 37 | SL RB   | Jiangqiao   | 123.69 | 46.79 | 16.26 | 2003–2020               | CRSB | Transfer   |
| 38 |         | Fuyu        | 124.81 | 45.17 | 7.18  | 2002–2020               | CRSB | Validation |
| 39 |         | Jiamusi     | 130.37 | 46.82 | 52.83 | 2003–2020               | CRSB | Validation |
| 40 |         | Tieling     | 123.84 | 42.33 | 12.08 | 2002–2017               | CRSB | Validation |
| 41 | SE RB   | Quxian      | 118.87 | 28.97 | 0.54  | 2004–2006,<br>2010–2020 | CRSB | Validation |
| 42 |         | Lanxi       | 119.47 | 29.22 | 1.82  | 2002–2020               | CRSB | Transfer   |
| 43 |         | Huashan     | 120.83 | 29.70 | 0.30  | 2004–2009,<br>2012–2020 | CRSB | Validation |
| 44 |         | Zhuji       | 120.22 | 29.68 | 0.17  | 2004–2020               | CRSB | Validation |
| 45 |         | Zhuqi       | 119.10 | 26.15 | 5.45  | 2002–2020               | CRSB | Validation |
| 46 | In. RB  | Yingluoxia  | 100.18 | 38.80 | 1.00  | 2003–2020               | CRSB | Validation |
| 47 |         | Buhahekou   | 99.74  | 37.04 | 1.43  | 2013–2020               | CRSB | Validation |
| 48 |         | Gangcha     | 100.13 | 37.32 | 0.14  | 2013–2020               | CRSB | Validation |
| 49 | SW RB   | Changdu     | 97.18  | 31.18 | 5.44  | 2000–2009               | AHR  | Transfer   |
| 50 |         | Nuxia       | 94.57  | 29.45 | 21.71 | 2000–2009               | AHR  | Validation |

Table S2. Basic information of ET observation stations. ENF is evergreen needleleaf forest, EBF is evergreen broadleaf forest, DNF is deciduous needleleaf forest, DBF is deciduous broadleaf forest, Mix is mixed forest, OSH is open shrubland, ARG is agriculture land, and GRA is grassland.

| FID | Flux station           | Lat (°) | Lon (°) | Year (month)                                                                 | Vegetation type | Source    |
|-----|------------------------|---------|---------|------------------------------------------------------------------------------|-----------------|-----------|
| 1   | Arou                   | 42.40   | 128.10  | 2008 (1–12), 2009 (1–12)                                                     | GRA             | ChinaFLUX |
| 2   | Changbaishan mountain1 | 45.28   | 127.58  | 2002 (1–12), 2003 (1–12), 2004 (1–12), 2005 (1–12), 2006 (1–12), 2007 (1–12) | ENF             | ChinaFLUX |
| 3   | Changwu                | 23.17   | 112.53  | 2008 (7–9), 2009 (7–9)                                                       | GRA             | ChinaFLUX |
| 4   | Dinghushan mountain1   | 26.74   | 115.06  | 2002 (1–12), 2003 (1–12), 2004 (1–12), 2005 (1–12), 2006 (1–12), 2007 (1–12) | EBF             | ChinaFLUX |
| 5   | Haibei alpine Tibet    | 36.83   | 116.57  | 2002 (1–12), 2003 (1–12), 2004 (1–12)                                        | GRA             | ChinaFLUX |

|    |                              |       |        |                                                                              |     |           |
|----|------------------------------|-------|--------|------------------------------------------------------------------------------|-----|-----------|
| 6  | Haibei shrubland             | 43.53 | 116.67 | 2002 (1–12), 2003 (1–12), 2004 (1–12)                                        | OSH | ChinaFLUX |
| 7  | Laoshan1                     | 21.92 | 101.27 | 2002 (1–12), 2003 (1–12), 2004 (1–12), 2005 (1–12), 2006 (1–12), 2007 (1–12) | DNF | ChinaFLUX |
| 8  | Qianyanzhou                  | 38.05 | 100.46 | 2002 (1–12), 2003 (1–12), 2004 (1–12), 2005 (1–12), 2006 (1–12), 2007 (1–12) | ENF | ChinaFLUX |
| 9  | Xilin Gol league             | 42.40 | 128.10 | 2002 (1–12), 2003 (1–12), 2004 (1–12), 2005 (1–12), 2006 (1–12), 2007 (1–12) | GRA | ChinaFLUX |
| 10 | Xishuangbanna                | 24.58 | 121.40 | 2002 (1–12), 2003 (1–12), 2004 (1–12), 2005 (1–12), 2006 (1–12), 2007 (1–12) | DBF | ChinaFLUX |
| 11 | Yucheng                      | 23.17 | 112.54 | 2002 (1–12), 2003 (1–12), 2004 (1–12), 2005 (1–12), 2006 (1–12), 2007 (1–12) | ARG | ChinaFLUX |
| 12 | Yuzhong                      | 31.58 | 121.90 | 2008 (7–9), 2009 (7–9)                                                       | GRA | ChinaFLUX |
| 13 | Changbaishan Mountain2       | 44.09 | 113.57 | 2003 (1–12)                                                                  | ENF | FLUXNET   |
| 14 | Chilanmountain research site | 42.05 | 116.67 | 2007 (1–12), 2008 (1–12), 2009 (1–12)                                        | EBF | FLUXNET   |
| 15 | Dinghushan mountain2         | 42.05 | 116.28 | 2003 (1–12)                                                                  | EBF | FLUXNET   |
| 16 | Dongtan2                     | 44.28 | 87.92  | 2005 (1–12)                                                                  | EBF | FLUXNET   |
| 17 | Duolun cropland              | 36.52 | 115.13 | 2006 (1–12)                                                                  | ARG | FLUXNET   |
| 18 | Duolun grassland             | 40.54 | 108.69 | 2006 (1–12)                                                                  | GRA | FLUXNET   |
| 19 | Fukang                       | 45.28 | 127.58 | 2006 (1–12), 2007 (1–12)                                                     | OSH | FLUXNET   |
| 20 | Guantao                      | 40.63 | 117.32 | 2009 (1–12)                                                                  | ARG | FLUXNET   |
| 21 | Kubuqi populus forest        | 42.93 | 120.70 | 2005 (1–12), 2006 (1–12)                                                     | DBF | FLUXNET   |
| 22 | Laoshan2                     | 37.53 | 105.80 | 2002 (1–12)                                                                  | DNF | FLUXNET   |
| 23 | Miyun                        | 32.56 | 116.78 | 2008 (1–12), 2009 (1–12)                                                     | DBF | FLUXNET   |
| 24 | Naiman                       | 44.13 | 116.33 | 2008 (1–12)                                                                  | GRA | FLUXNET   |
| 25 | Shapotou                     | 43.55 | 116.67 | 2009 (1–12)                                                                  | OSH | FLUXNET   |
| 26 | Shouxian                     | 39.09 | 100.30 | 2005 (1–12)                                                                  | EBF | FLUXNET   |
| 27 | Xilindongsu                  | 38.05 | 100.46 | 2008 (1–12)                                                                  | GRA | FLUXNET   |
| 28 | Xilinhot grassland site      | 38.92 | 100.30 | 2006 (1–12)                                                                  | GRA | FLUXNET   |

|    |                                               |       |        |                                       |     |         |
|----|-----------------------------------------------|-------|--------|---------------------------------------|-----|---------|
| 29 | Xilinhot Inner Mongolia fenced typical steppe | 38.86 | 100.37 | 2004 (1–12), 2005 (1–12), 2006 (1–12) | GRA | FLUXNET |
| 30 | Zhangye                                       | 38.84 | 98.94  | 2008 (1–12)                           | OSH | FLUXNET |
| 31 | Arou superstation                             | 41.99 | 101.12 | 2013 (1–11)                           | GRA | HiWATER |
| 32 | Bajitan                                       | 38.77 | 100.32 | 2012 (10–12), 2013 (1–12)             | OSH | HiWATER |
| 33 | Daman superstation                            | 41.99 | 101.13 | 2012 (10–12), 2013 (1–12)             | ARG | HiWATER |
| 34 | Dashalong                                     | 42.00 | 101.13 | 2013 (9–12)                           | GRA | HiWATER |
| 35 | Huazhaizi                                     | 38.79 | 100.49 | 2012 (10–12), 2013 (1–12)             | OSH | HiWATER |
| 36 | Hunhelin                                      | 42.00 | 101.14 | 2013 (8–12)                           | DBF | HiWATER |
| 37 | Huyanglin                                     | 38.98 | 100.45 | 2013 (8–12)                           | DBF | HiWATER |
| 38 | Luodi                                         | 37.61 | 101.32 | 2013 (8–12)                           | BAR | HiWATER |
| 39 | Shenshawo                                     | 37.37 | 101.18 | 2013 (10–12)                          | OSH | HiWATER |
| 40 | Sidaoqiao superstation                        | 35.25 | 107.68 | 2013 (7–12)                           | DNF | HiWATER |
| 41 | Zhangye                                       | 35.95 | 104.13 | 2012 (7–12), 2013(1–11)               | GRA | HiWATER |

Tab. S3. Comparison of monthly observed runoff and VIC-simulated runoff across the nine major river basins. Due to shorter observation periods, the Guantai and Yuancunji stations are used only for parameter calibration.

| FID        | River basin | Hydrological station | Calibration period |            |            |             | Validation period |            |            |             |
|------------|-------------|----------------------|--------------------|------------|------------|-------------|-------------------|------------|------------|-------------|
|            |             |                      | <i>R</i>           | <i>NSE</i> | <i>KGE</i> | <i>Bias</i> | <i>R</i>          | <i>NSE</i> | <i>KGE</i> | <i>Bias</i> |
| 1          | Yz. RB      | Beibei               | 0.93               | 0.84       | 0.76       | 0.48%       | 0.90              | 0.56       | 0.58       | -32.93%     |
|            |             | Dufengkeng           | 0.90               | 0.80       | 0.76       | 9.36%       | 0.96              | 0.89       | 0.78       | -2.16%      |
|            |             | Huangzhuang          | 0.87               | 0.75       | 0.80       | -0.56%      | 0.82              | 0.66       | 0.81       | 5.40%       |
|            |             | Hushan               | 0.94               | 0.86       | 0.80       | -3.52%      | 0.96              | 0.83       | 0.81       | -6.22%      |
|            |             | Lijiadu              | 0.91               | 0.81       | 0.74       | 7.65%       | 0.97              | 0.86       | 0.69       | 8.13%       |
|            |             | Tongzilin            | 0.82               | 0.67       | 0.72       | -6.56%      | 0.76              | 0.42       | 0.70       | -17.25%     |
|            |             | Waizhou              | 0.90               | 0.79       | 0.89       | -0.53%      | 0.88              | 0.76       | 0.83       | -9.27%      |
|            |             | Wanjiabu             | 0.94               | 0.88       | 0.86       | 2.92%       | 0.88              | 0.76       | 0.80       | 8.19%       |
|            |             | Wulong               | 0.92               | 0.83       | 0.77       | -0.64%      | 0.86              | 0.73       | 0.83       | -6.45%      |
|            |             | Xiangtan             | 0.92               | 0.82       | 0.85       | -9.98%      | 0.91              | 0.79       | 0.78       | -13.68%     |
|            |             | Zhimenda             | 0.89               | 0.63       | 0.58       | 40.31%      | 0.85              | 0.60       | 0.65       | 31.68%      |
| Basin mean | 0.90        | 0.79                 | 0.78               | 3.54%      | 0.89       | 0.71        | 0.75              | -3.14%     |            |             |
| 2          | Ye. RB      | Baimasi              | 0.83               | 0.61       | 0.56       | -23.41%     | 0.89              | 0.75       | 0.69       | -17.59%     |
|            |             | Huaxian              | 0.93               | 0.84       | 0.82       | 16.14%      | 0.87              | 0.72       | 0.73       | 17.57%      |
|            |             | Tangnaihαι           | 0.89               | 0.71       | 0.77       | 19.58%      | 0.81              | 0.62       | 0.80       | 7.60%       |
|            |             | Wuzhi                | 0.92               | 0.84       | 0.86       | 5.60%       | 0.80              | 0.63       | 0.65       | -5.31%      |
|            |             | Xianyang             | 0.89               | 0.74       | 0.72       | 24.55%      | 0.85              | 0.68       | 0.60       | 17.27%      |
|            |             | Zhangjiashan         | 0.86               | 0.73       | 0.75       | 2.35%       | 0.86              | 0.62       | 0.74       | 12.46%      |

|    |              |             |      |      |      |         |      |      |      |         |
|----|--------------|-------------|------|------|------|---------|------|------|------|---------|
|    |              | Zhuangtou   | 0.78 | 0.58 | 0.64 | -19.27% | 0.84 | 0.56 | 0.73 | -0.05%  |
|    |              | Basin mean  | 0.87 | 0.72 | 0.73 | 3.65%   | 0.85 | 0.65 | 0.71 | 4.56%   |
| 3  | Huai. RB     | Bengbu      | 0.94 | 0.83 | 0.69 | 6.88%   | 0.84 | 0.68 | 0.65 | 3.09%   |
|    |              | Fuyang      | 0.90 | 0.66 | 0.42 | 56.37%  | 0.90 | 0.64 | 0.46 | 51.69%  |
|    |              | Linyi       | 0.94 | 0.83 | 0.68 | 14.40%  | 0.97 | 0.89 | 0.60 | 33.76%  |
|    |              | Basin mean  | 0.93 | 0.77 | 0.60 | 25.88%  | 0.90 | 0.74 | 0.57 | 29.51%  |
| 4  | Hai. RB      | Guantai     | 0.80 | 0.62 | 0.64 | 30.16%  | /    | /    | /    | /       |
|    |              | Xiahui      | 0.60 | 0.34 | 0.48 | 8.81%   | 0.69 | 0.47 | 0.60 | -6.67%  |
|    |              | Yuancunji   | 0.87 | 0.69 | 0.62 | 32.32%  | /    | /    | /    | /       |
|    |              | Zhangjiafen | 0.59 | 0.32 | 0.50 | 3.44%   | 0.70 | 0.40 | 0.67 | 14.55%  |
|    |              | Basin mean  | 0.72 | 0.49 | 0.56 | 18.68%  | 0.70 | 0.44 | 0.64 | 3.94%   |
| 5  | Pe. RB       | Boluo       | 0.88 | 0.77 | 0.81 | 7.80%   | 0.87 | 0.76 | 0.78 | 0.93%   |
|    |              | Nanning     | 0.94 | 0.78 | 0.72 | 27.74%  | 0.92 | 0.80 | 0.83 | 14.71%  |
|    |              | Qianjiang   | 0.89 | 0.78 | 0.77 | 7.73%   | 0.80 | 0.60 | 0.80 | -4.48%  |
|    |              | Shijiao     | 0.97 | 0.95 | 0.85 | -0.08%  | 0.97 | 0.94 | 0.91 | -2.46%  |
|    |              | Xiaolongtan | 0.89 | 0.77 | 0.74 | 8.10%   | 0.89 | 0.76 | 0.68 | 4.63%   |
|    |              | Basin mean  | 0.91 | 0.81 | 0.78 | 10.26%  | 0.89 | 0.77 | 0.80 | 2.67%   |
| 6  | SL RB        | Fuyu        | 0.74 | 0.49 | 0.58 | -20.69% | 0.81 | 0.62 | 0.81 | -2.99%  |
|    |              | Jiamusi     | 0.81 | 0.61 | 0.81 | 2.63%   | 0.87 | 0.74 | 0.87 | -2.87%  |
|    |              | Tieling     | 0.82 | 0.52 | 0.37 | 25.61%  | 0.46 | 0.09 | 0.42 | 9.32%   |
|    |              | Basin mean  | 0.79 | 0.54 | 0.59 | 2.52%   | 0.71 | 0.48 | 0.70 | 1.15%   |
| 7  | SE RB        | Huashan     | 0.90 | 0.78 | 0.74 | 5.19%   | 0.88 | 0.76 | 0.73 | 4.33%   |
|    |              | Quxian      | 0.97 | 0.83 | 0.65 | -9.03%  | 0.96 | 0.83 | 0.66 | -13.05% |
|    |              | Zhuji       | 0.94 | 0.82 | 0.70 | 1.72%   | 0.93 | 0.82 | 0.74 | 12.42%  |
|    |              | Zhuqi       | 0.92 | 0.84 | 0.85 | 3.54%   | 0.90 | 0.81 | 0.88 | 1.51%   |
|    |              | Basin mean  | 0.93 | 0.82 | 0.74 | 0.36%   | 0.92 | 0.81 | 0.75 | 1.30%   |
| 8  | In. RB       | Buhahekou   | 0.80 | 0.64 | 0.73 | 5.34%   | 0.92 | 0.80 | 0.72 | -14.76% |
|    |              | Gangcha     | 0.97 | 0.92 | 0.89 | -9.82%  | 0.88 | 0.61 | 0.50 | -40.77% |
|    |              | Yingluoxia  | 0.96 | 0.77 | 0.70 | -29.67% | 0.97 | 0.71 | 0.63 | -36.53% |
|    |              | Basin mean  | 0.91 | 0.78 | 0.77 | -11.38% | 0.92 | 0.71 | 0.62 | -30.69% |
| 9  | SW RB        | Nuxia       | 0.83 | 0.53 | 0.51 | -35.83% | 0.80 | 0.54 | 0.63 | -26.87% |
|    |              | Basin mean  | 0.83 | 0.53 | 0.51 | -35.83% | 0.80 | 0.54 | 0.63 | -26.87% |
| 10 | Overall mean |             | 0.88 | 0.73 | 0.71 | 5.05%   | 0.86 | 0.68 | 0.71 | -0.08%  |
